# Supplementary material for: Chicken blastoderms and primordial germ cells possess a higher expression of DNA repair genes and lower expression of apoptosis genes to preserve their genome stability
Source: PubMed Central journal article supplement (PMC8741993; doi:10.1038/s41598-021-04417-y), 2022-01-07
Supplement: 41598_2021_4417_MOESM1_ESM.pdf [file 41598_2021_4417_MOESM1_ESM.pdf]

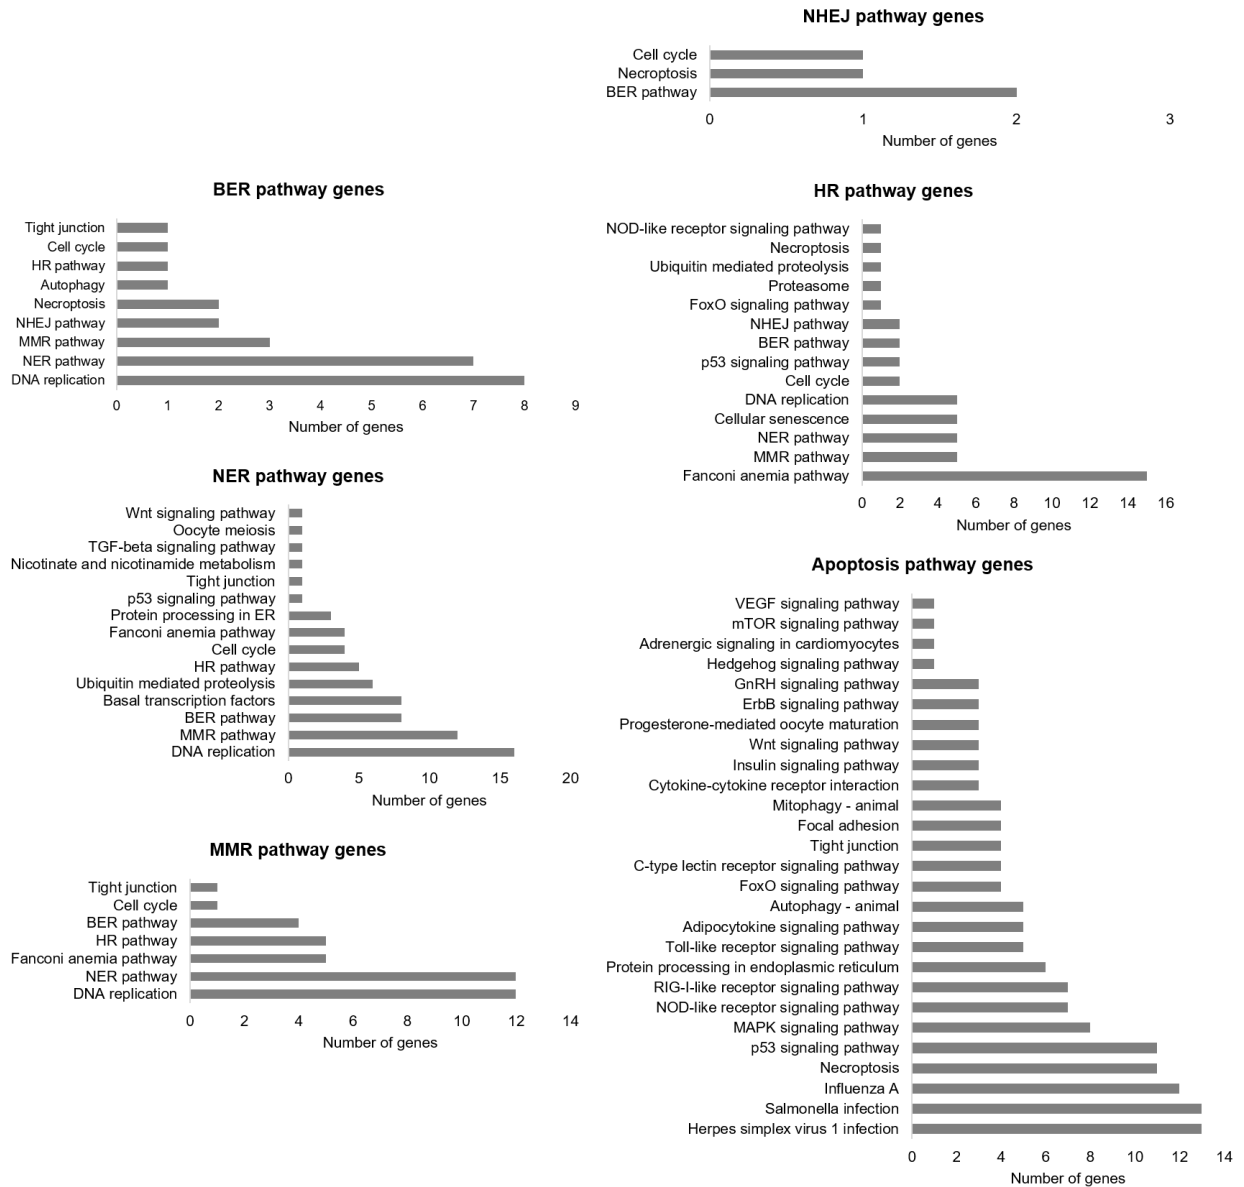

**Supplementary Figure S1.** Involvement of BER, NER, MMR, NHEJ, HR, and apoptosis pathway genes in other pathways.

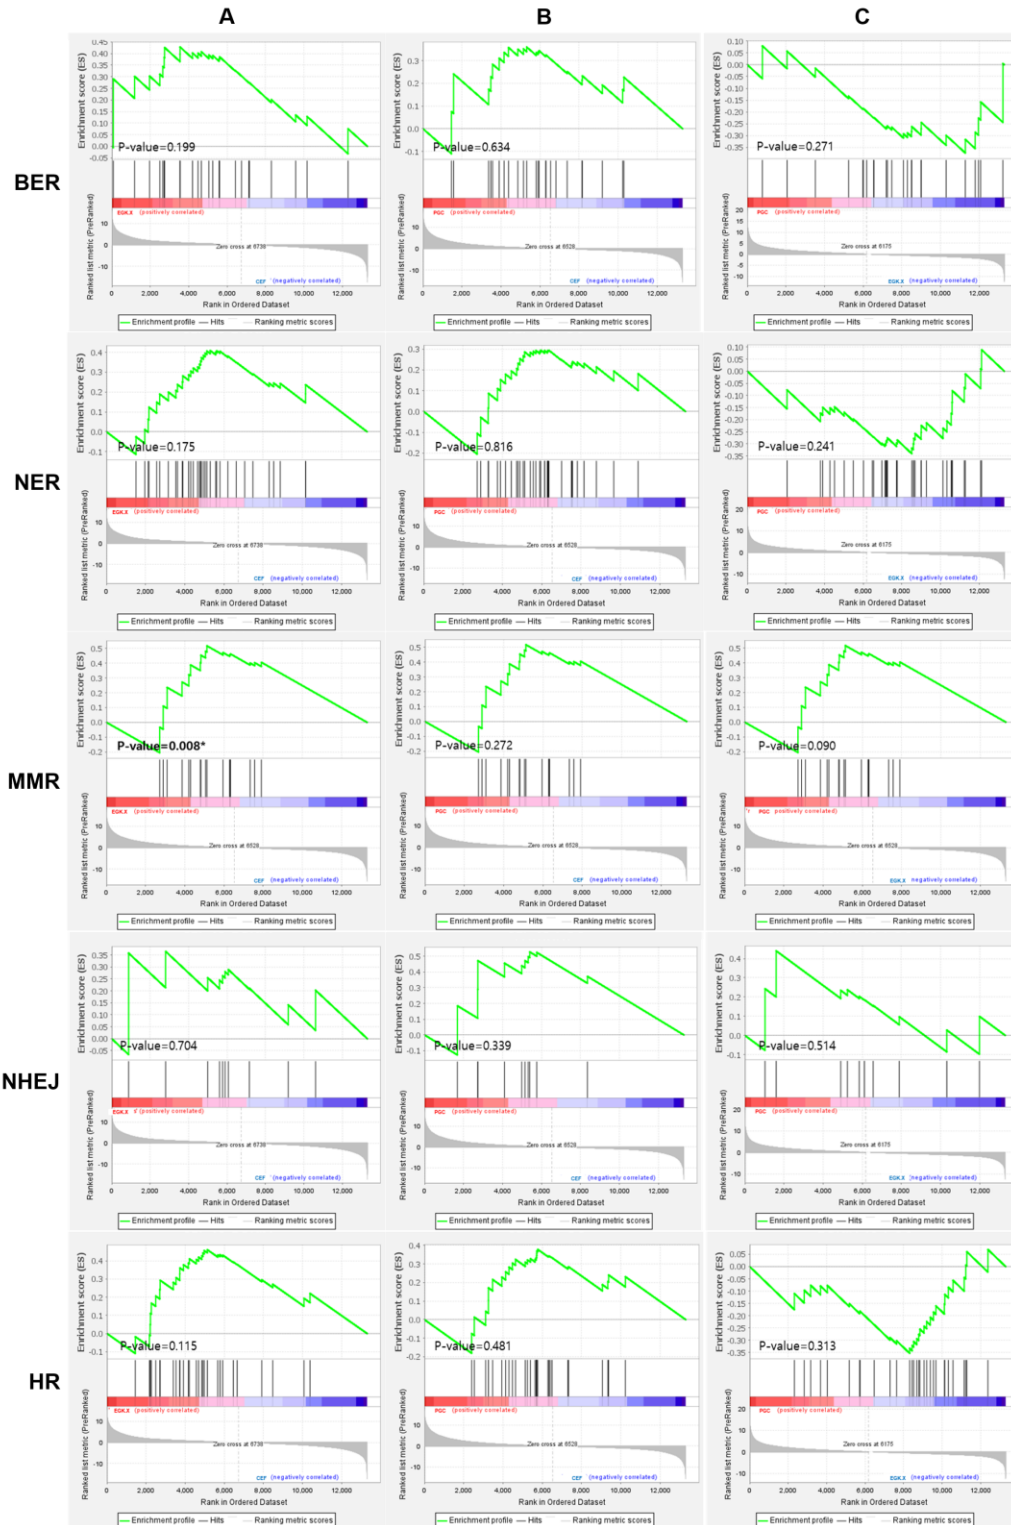

**Supplementary Figure S2.** GSEA of DNA repair (BER, NER, MMR, NHEJ, and HR) pathway at CEFs versus EGK.X blastoderms (A), CEFs versus PGCs (B), and EGK.X blastoderms versus PGCs (C) conditions.

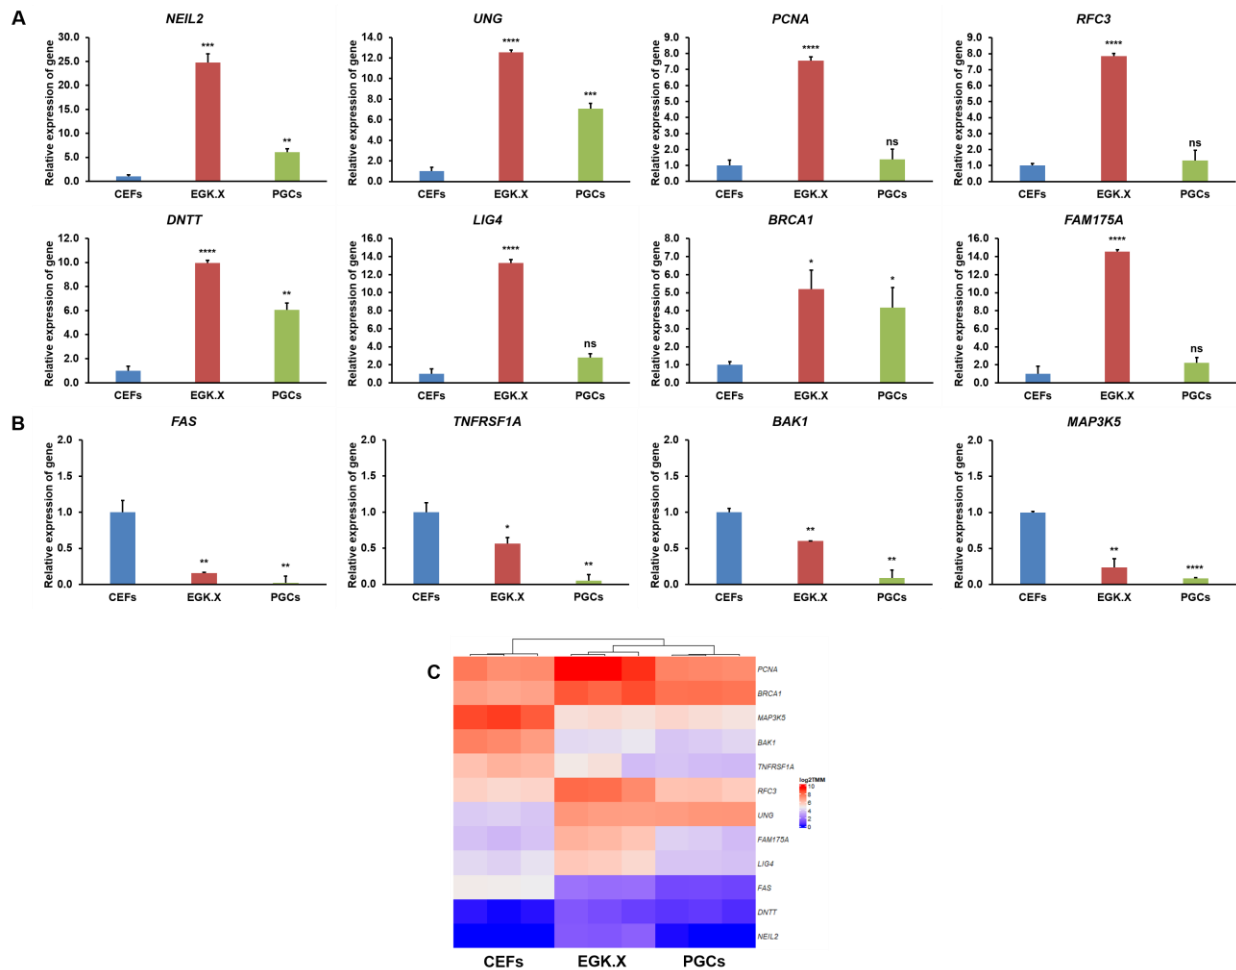

**Supplementary Figure S3.** RT-qPCR validation of DNA repair and apoptosis pathway genes. **A**, candidate genes from the BER pathway (*NEIL2* and *UNG*), NER/MMR pathway (*PCNA* and *RFC3*), NHEJ pathway (*DNTT* and *LIG4*), and HR pathway (*BRCA1* and *FAM175A*). **B**, candidate genes from the extrinsic (*FAS* and *TNFRSF1A*), intrinsic (*BAK1*), and FAS-JNK (*MAP3K5*) mediated apoptosis pathway. Genes were amplified with their specific qPCR primers. The relative expression of genes was normalized with the chicken *GAPDH* and a reference sample (CEFs), and analyzed by the  $2^{-\Delta\Delta C_t}$  method. Significant differences between the CEFs and other test samples were determined by Student's *t*-test. Statistical significance was ranked as \*  $P < 0.05$ , \*\*  $P < 0.01$ , \*\*\*  $P < 0.001$ , or \*\*\*\*  $P < 0.0001$ . ns: non-significant. **C**, Heatmaps using  $\log_2$  TMM values of the normalized read counts of genes shown in **A** and **B** were prepared separately for better visualization.
